# Supplementary material
Source: publisher figshare collection journal article supplement (https://acs.figshare.com/ndownloader/files/4975807)
Supplement: Supplementary file 1 [file 4975807]

## Supporting Information

# Demonstration of hexagonal phase silicon carbide nanowires with vertical alignment

*Lunet E. Luna,<sup>†</sup> Colin Ophus,<sup>‡</sup> Jonas Johansson,<sup>§</sup> Roya Maboudian<sup>†\*</sup>, and Carlo Carraro<sup>†</sup>*

<sup>†</sup>Department of Chemical and Biomolecular Engineering, University of California, Berkeley, California 94720, USA

<sup>‡</sup>National Center for Electron Microscopy, Molecular Foundry, Lawrence Berkeley National Lab, Berkeley, California 94720, USA

<sup>§</sup>Solid State Physics and NanoLund, Lund University, Box 118, S-22100 Lund, Sweden

### Corresponding Author

\* (R.M.) E-mail: maboudia@berkeley.edu

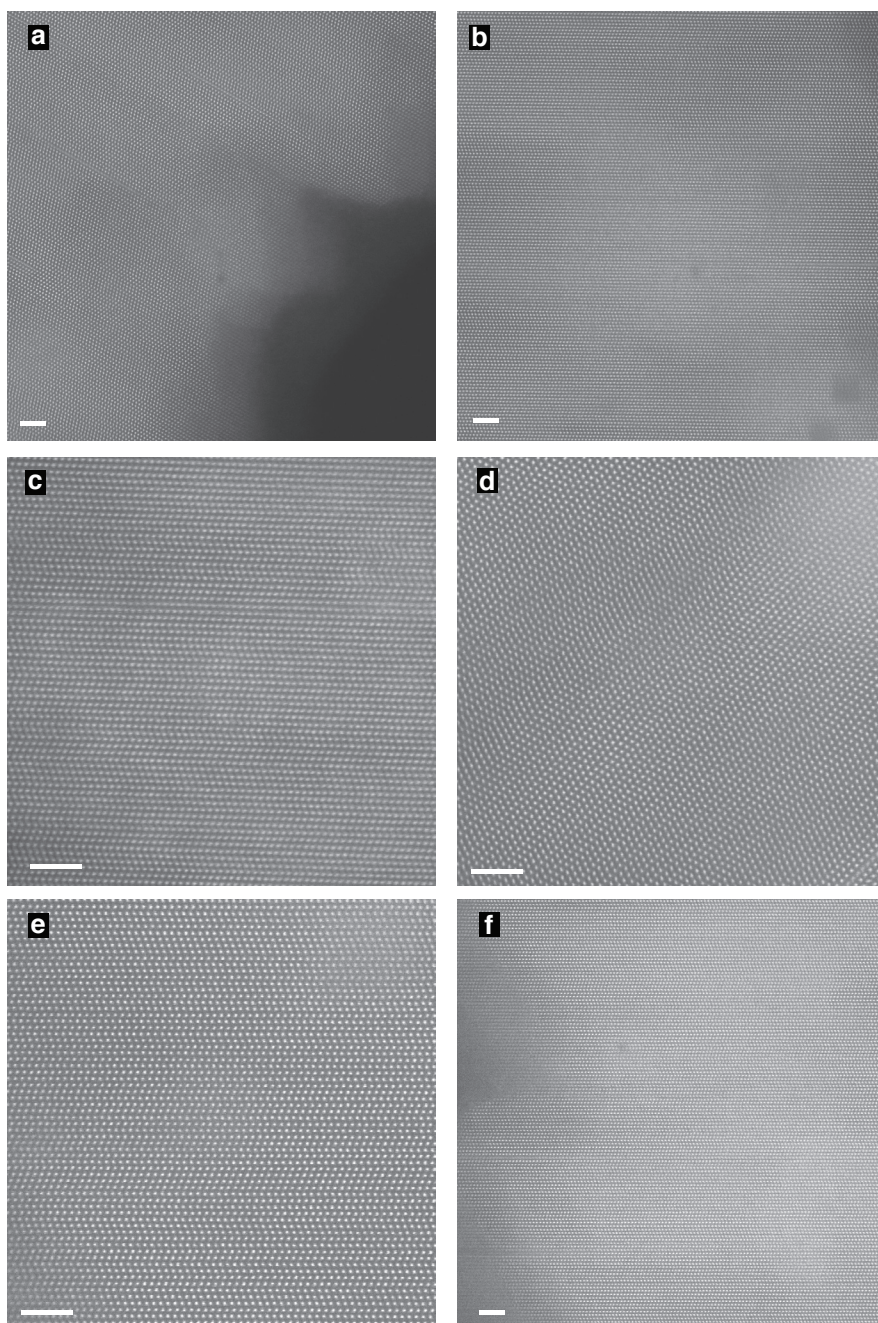

**Figure S1.** Atomic resolution by high-resolution STEM imaging was used to characterize polytype mixture. (a-f) Original micrographs of 6 different nanowires that were used to determined the combined statistics over 645 Si-C units in Figure 2 of main text. All scale bars are 2 nm.

**Table S1.** Identification of polytypes and local hexagonal planes.

| Image in Supplementary Figure 1 | Total No. of planes | No. of 3C planes | No. of 2H planes | No. of 4H planes | No. of locally hexagonal planes |
|---------------------------------|---------------------|------------------|------------------|------------------|---------------------------------|
| a                               | 172                 | 31               | 78               | 70               | 104                             |
| b                               | 128                 | 13               | 52               | 67               | 77                              |
| c                               | 64                  | 13               | 21               | 29               | 35                              |
| d                               | 92                  | 17               | 40               | 23               | 54                              |
| e                               | 65                  | 10               | 49               | 19               | 43                              |
| f                               | 124                 | 21               | 64               | 44               | 79                              |
| Combined statistic (sum)        | 645                 | 105              | 304              | 252              | 392                             |
| Combined statistic              | -                   | 16.3 %           | 47.1 %           | 39.1 %           | 60.8 %                          |

**Table S2.** Estimated step energy ( $\Gamma_i$ ) for SiC.

|                                             | Equation                                                                                                                   | Diamond                                | Si*                      | SiC                        |
|---------------------------------------------|----------------------------------------------------------------------------------------------------------------------------|----------------------------------------|--------------------------|----------------------------|
| Lattice constant, $a$                       | -                                                                                                                          | $3.57 \times 10^{-8}$ cm               | -                        | -                          |
| Density, $\rho$                             | -                                                                                                                          | 3.515 g/cm <sup>3</sup>                | -                        | -                          |
| Molecular weight, $MW$                      | -                                                                                                                          | 12.01 g/mol                            | -                        | -                          |
| Atomic density, $q$                         | $q \times N_A / MW$                                                                                                        | $1.76 \times 10^{23}$ cm <sup>-3</sup> | -                        | -                          |
| Heat of fusion, $\Delta H^\dagger$          | -                                                                                                                          | 120 kJ/mol                             | -                        | -                          |
|                                             |                                                                                                                            | $1.99 \times 10^{-12}$ erg/atom        | -                        | -                          |
| Melting temperature, $T_m^{\dagger\dagger}$ | -                                                                                                                          | 4100 K                                 | -                        | -                          |
| Excess energy of interfacial bond, $W$      | $0.45 \times \Delta H$                                                                                                     | $8.96 \times 10^{-13}$ erg/atom        | -                        | -                          |
| Step energy**, $\gamma_{3C}$                | $1.5^{1/2} q^{2/3} \left\{ \frac{W}{3} - k_B T_m \ln \left[ 1 + 2 \exp \left( \frac{-W}{k_B T_m} \right) \right] \right\}$ | 402.6 erg/cm <sup>2</sup>              | 87.6 erg/cm <sup>2</sup> | 245*** erg/cm <sup>2</sup> |

\* See ref 1.

\*\* The step energy for diamond was calculated using equation given in ref 1, adapted from ref 2.

\*\*\* Taken as the average value of diamond and Si.

† Heat of fusion of diamond is estimated as graphite's heat of fusion, measured by ref 3.

†† Melting temperature of diamond is estimated as the diamond/graphite/liquid triple point at 125 kbar, given in ref 4.

Gibbs free energy for nucleation,  $\Delta G_i$  :

$$\Delta G_i = -\frac{\pi}{2s} r^2 \Delta \mu + \frac{\pi}{2} r^2 \sigma_i + r \Gamma_i$$

Energy barrier for nucleation,  $\Delta G_i^*$  :  $\downarrow$  nucleus orientation  
i = h (hexagonal) or k (cubic)

$$\Delta G_i^* = \frac{\Gamma_i^2}{2\pi \left( \frac{\Delta \mu}{s} - \sigma_i \right)}$$

$\downarrow$   
Nucleation rate  $\propto \exp(-\Delta G_i^*/k_B T)$ . Probability of stacking nucleus with orientation i :

$$p_i = \frac{\exp\left(-\Delta G_i^*/k_B T\right)}{\sum_i \exp\left(-\Delta G_i^*/k_B T\right)}$$

$\downarrow$   
Polytype formation probability  $\rho_{3C}$ ,  $\rho_{4H}$ , and  $\rho_{2H}$

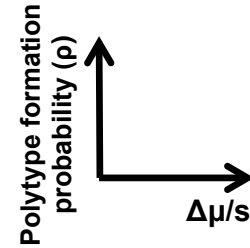

**Figure S2.** Flow diagram of how Figure 3a in the main text is generated for a nucleus with semicircular geometry. The free variable is  $\Delta \mu/s$  and is plotted on the x-axis. See Figure S3 for a description of how interface energy ( $\sigma_i$ ) is estimated. Table S2 shows how the step energy ( $\Gamma_i$ ) is estimated. The probability factors for stacking a nucleus with orientation i is defined as  $p_i$ . The polytype formation probability is then given  $\rho_i$ , which is a function of  $p_i$  as detailed in ref 5.

$$\sigma_i = \sigma_o - J_1 s_1 s_2 - J_2 s_1 s_3$$

i = denotes polytype

$\sigma$  = estimated interface energy

$\sigma_o$  = reference value (no interaction)

$J$  = interaction parameter between the nucleating layer and its nearest (1) and next nearest (2) neighbor

$s$  = layer orientation: '+' is ABC stacking (forward) and '-' is CBA stacking (reverse)

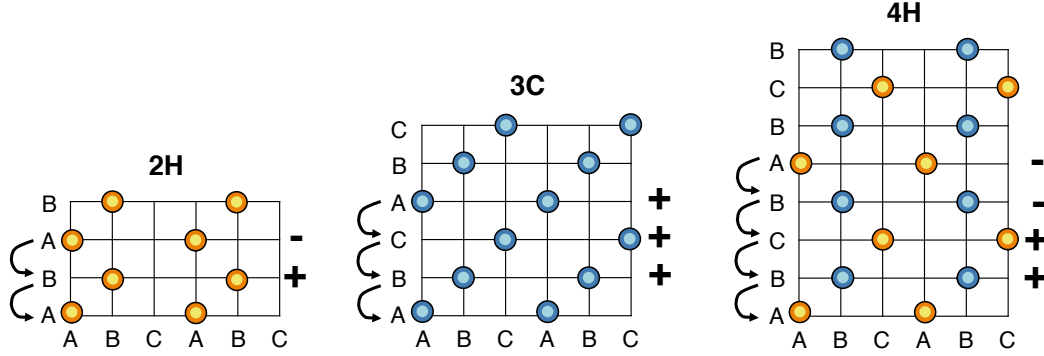

**Figure S3.** The axial next nearest neighbor Ising (ANNNI) model is used to estimate the interface energies ( $\sigma_i$ ) of the 2H, 3C, and 4H polytypes. Table S2 shows how the step energy ( $\Gamma_i$ ) is estimated. The twin plane energy ( $\sigma_t$ ) is related to the interaction parameters  $J_1$  and  $J_2$  by the following relationship:  $\sigma_t = 2(J_1 + 2J_2)$ . Using this relationship, the interface energy  $\sigma_i$  can be rearranged in terms of  $\sigma_t$  (estimated as half the stacking fault energy or 17.5 mJ/m<sup>2</sup> for SiC) and  $\eta = -J_1/J_2$ .<sup>1,5,6</sup>

## References

1. Hurle, D.T.J. A mechanism for twin formation during Czochralski and encapsulated vertical Bridgman growth of III-V compound semiconductors. *J. Cryst. Growth* **1995**, *147*, 239-250.
2. Voronkov, V.V. Supercooling at the face developing on a rounded crystallization front. *Sov. Phys.-Crystallogr.* **1973**, *17*, 807-813.
3. Heremans, J.; Olk, C.H.; Eesley, G.L.; Steinbeck, J.; Dresselhaus, G. Observation of metallic conductivity in liquid carbon. *Phys. Rev. Lett.* **1988**, *60*, 452-455.
4. Bundy, F.P. Direct conversion of graphite to diamonds in static pressure apparatus. *J. Chem. Phys.* **1963**, *38*, 631-643.
5. Johansson, J.; Bolinsson, J.; Ek, M.; Caroff, P.; Dick, K.A. Combinatorial approaches to understanding polytypism in III-V nanowires. *ACS Nano* **2012**, *6*, 6142-6149.
6. Ning, X.G.; Ye, H.Q. Experimental determination of the intrinsic stacking-fault energy of SiC crystals. *J. Phys.: Condens. Mat.* **1990**, *2*, 10223-10225.
